# Supplementary material for: The effect of mutations derived from mouse-adapted H3N2 seasonal influenza A virus to pathogenicity and host adaptation
Source: PubMed Central journal article supplement (PMC6952113; doi:10.1371/journal.pone.0227516), 2020-01-09
Supplement: pone.0227516.s001.pdf [file pone.0227516.s001.pdf]

## Supplemental Data

**S1 Table. MLD<sub>50</sub> of Balb/c-passaged clones in Balb/c mice**

| Virus   | Titer<br>(PFU/mL)  | No. of<br>dead mice | No. of<br>survival mice | Log MLD <sub>50</sub><br>(PFU/mL) |
|---------|--------------------|---------------------|-------------------------|-----------------------------------|
| SW293   | $2.79 \times 10^7$ | 0                   | 4                       | > 7.45                            |
|         | $2.79 \times 10^6$ | 0                   | 5                       |                                   |
|         | $2.79 \times 10^5$ | 0                   | 5                       |                                   |
|         | $2.79 \times 10^4$ | 0                   | 5                       |                                   |
|         | $2.79 \times 10^3$ | 0                   | 5                       |                                   |
|         | $2.79 \times 10^2$ | 0                   | 5                       |                                   |
| B_P8_C2 | $7.88 \times 10^7$ | 5                   | 0                       | 4.40                              |
|         | $7.88 \times 10^6$ | 5                   | 0                       |                                   |
|         | $7.88 \times 10^5$ | 5                   | 0                       |                                   |
|         | $7.88 \times 10^4$ | 5                   | 0                       |                                   |
|         | $7.88 \times 10^3$ | 0                   | 5                       |                                   |
|         | $7.88 \times 10^2$ | 0                   | 5                       |                                   |
| B_P9_C2 | $4.78 \times 10^7$ | 5                   | 0                       | 4.30                              |
|         | $4.78 \times 10^6$ | 5                   | 0                       |                                   |
|         | $4.78 \times 10^5$ | 4                   | 0                       |                                   |
|         | $4.78 \times 10^4$ | 4                   | 1                       |                                   |
|         | $4.78 \times 10^3$ | 0                   | 5                       |                                   |
|         | $4.78 \times 10^2$ | 0                   | 5                       |                                   |

Balb/c mice were inoculated with SW293, B\_P8\_C2, or B\_P9\_C2, and the live and dead mice were counted daily for nine days. The 50% mouse lethal dose (MLD<sub>50</sub>) was calculated using Reed-Muench method.
